# Supplementary material for: Multi-Agent Reinforcement Learning for Smart Community Energy Management
Source: Preprints.org preprint supplement (doi:10.20944/preprints202410.0082.v1), 2024-10-01
Supplement: Supplementary file 1 [file supplementary]

## Sheet: RewardGraphs
Step	Strats	Peak	Central	AllShared	StratsMean	PeakMean	CentralMean	AllSharedMean	StratsSTDV	PeakSTDV	CentralSTDV	AllSharedSTDV	StratsAUC	PeakAUC	CentralAUC	AllSharedAUC
999	0.192863	0.153252	-0.363283	0.146894	0.271432	0.270603	0.251586	0.269398	0.00714315	0.0101186	0.0476817	0.012252	70.5724	70.3567	65.4123	70.0436
1998	0.269386	0.249085	0.125837	0.195328
2997	0.268868	0.259367	-0.0696727	0.195701
3996	0.2687	0.265661	0.161468	0.224559
4995	0.269595	0.266913	0.17354	0.265312
5994	0.255409	0.234358	0.16225	0.255995
6993	0.270742	0.215566	0.208124	0.265465
7992	0.262041	0.269498	0.172223	0.260093
8991	0.270652	0.269629	0.20641	0.264848
9990	0.269996	0.27202	0.221338	0.273457
10989	0.246765	0.259333	0.145417	0.271631
11988	0.269506	0.272574	0.203881	0.267541
12987	0.2725	0.265768	0.212248	0.26979
13986	0.273486	0.246488	0.261507	0.2619
14985	0.275696	0.260385	0.262205	0.262533
15984	0.247124	0.267449	0.273211	0.256989
16983	0.271006	0.274792	0.255075	0.2714
17982	0.273812	0.252662	0.243242	0.262727
18981	0.271681	0.276622	0.248276	0.263414
19980	0.27418	0.276591	0.252914	0.263853
20979	0.266305	0.272383	0.266277	0.274378
21978	0.270631	0.270371	0.217419	0.273884
22977	0.268669	0.275461	0.262961	0.262519
23976	0.271742	0.269832	0.249808	0.27365
24975	0.275397	0.252803	0.266849	0.264296
25974	0.277382	0.274306	0.26892	0.268462
26973	0.277451	0.273069	0.242496	0.275066
27972	0.276577	0.276237	0.24974	0.273858
28971	0.259886	0.273665	0.258427	0.26107
29970	0.273729	0.275968	0.268959	0.272405
30969	0.269518	0.271772	0.262479	0.274179
31968	0.275504	0.274901	0.192629	0.25968
32967	0.269428	0.274448	0.265229	0.272582
33966	0.27216	0.271863	0.270418	0.263078
34965	0.271203	0.267286	0.253244	0.273443
35964	0.271744	0.26394	0.219243	0.26271
36963	0.269363	0.277421	0.263881	0.273863
37962	0.277402	0.277076	0.264078	0.272901
38961	0.25525	0.267717	0.265536	0.267034
39960	0.275469	0.275913	0.266381	0.261235
40959	0.273526	0.271009	0.249736	0.271484
41958	0.274994	0.257771	0.262382	0.265162
42957	0.275264	0.259912	0.271597	0.269
43956	0.274253	0.277296	0.269383	0.275118
44955	0.268898	0.276664	0.251474	0.273196
45954	0.270221	0.263147	0.26862	0.2757
46953	0.269966	0.269635	0.251972	0.271153
47952	0.272379	0.268514	0.265222	0.274281
48951	0.261819	0.261807	0.265078	0.272248
49950	0.275124	0.265727	0.255401	0.269694
50949	0.273348	0.268285	0.256606	0.243427
51948	0.277712	0.264152	0.260051	0.260904
52947	0.269717	0.271766	0.264588	0.273155
53946	0.276584	0.273207	0.257835	0.27415
54945	0.270478	0.275132	0.257989	0.274269
55944	0.275354	0.27626	0.270843	0.257604
56943	0.274935	0.276316	0.265592	0.269565
57942	0.273212	0.258284	0.259376	0.268906
58941	0.275673	0.272494	0.270897	0.272372
59940	0.276373	0.277446	0.275669	0.26095
60939	0.268827	0.275871	0.268506	0.274977
61938	0.27733	0.276204	0.255547	0.26684
62937	0.274897	0.273192	0.25808	0.272569
63936	0.275239	0.26851	0.239478	0.267326
64935	0.265722	0.267077	0.228333	0.275795
65934	0.266581	0.276654	0.238952	0.270304
66933	0.269363	0.273867	0.271875	0.261407
67932	0.273467	0.272808	0.269925	0.273413
68931	0.271372	0.269722	0.249047	0.275724
69930	0.266716	0.271004	0.256359	0.266673
70929	0.277069	0.261713	0.239098	0.258607
71928	0.27363	0.263824	0.261321	0.27341
72927	0.251849	0.271852	0.25588	0.267891
73926	0.266328	0.261844	0.251532	0.256646
74925	0.276438	0.276289	0.257359	0.276763
75924	0.270586	0.275235	0.253233	0.27772
76923	0.273418	0.27312	0.269565	0.273555
77922	0.268737	0.276941	0.25536	0.27529
78921	0.263508	0.274135	0.264075	0.267993
79920	0.274032	0.270424	0.266513	0.277072
80919	0.271436	0.276023	0.260945	0.271501
81918	0.271401	0.271379	0.226947	0.276017
82917	0.275389	0.276716	0.26322	0.276017
83916	0.263907	0.269378	0.26631	0.276483
84915	0.265727	0.275633	0.26321	0.267849
85914	0.276912	0.27284	0.238261	0.270589
86913	0.274877	0.276761	0.269008	0.266392
87912	0.270199	0.27386	0.268143	0.275218
88911	0.257277	0.27077	0.22955	0.27485
89910	0.268885	0.276533	0.236929	0.274451
90909	0.275448	0.27562	0.254574	0.269284
91908	0.262633	0.272243	0.266982	0.269928
92907	0.275444	0.257943	0.263667	0.276004
93906	0.272776	0.276706	0.267514	0.273068
94905	0.276406	0.27339	0.269842	0.273465
95904	0.270956	0.27657	0.256449	0.275888
96903	0.275293	0.267449	0.230968	0.268251
97902	0.274724	0.274665	0.25967	0.274721
98901	0.275994	0.275381	0.266477	0.276223
99900	0.268783	0.276689	0.251818	0.265462
100899	0.266141	0.269631	0.24848	0.272601
101898	0.273071	0.27092	0.258315	0.268063
102897	0.274778	0.272976	0.264214	0.275721
103896	0.276347	0.275147	0.264829	0.269741
104895	0.271059	0.272859	0.260339	0.275056
105894	0.262767	0.264881	0.249088	0.272291
106893	0.27592	0.274226	0.272136	0.275119
107892	0.257319	0.272882	0.25525	0.272446
108891	0.267353	0.270368	0.26923	0.276124
109890	0.270857	0.274382	0.252676	0.273552
110889	0.273158	0.275852	0.244877	0.272238
111888	0.268265	0.259208	0.271657	0.262683
112887	0.276315	0.271939	0.263613	0.272072
113886	0.276511	0.272339	0.262403	0.275244
114885	0.275306	0.268528	0.246028	0.275399
115884	0.274245	0.261295	0.25509	0.275385
116883	0.277112	0.274158	0.255086	0.275422
117882	0.276887	0.275763	0.260223	0.275983
118881	0.276593	0.274901	0.250654	0.267108
119880	0.271843	0.275246	0.250423	0.270691
120879	0.272006	0.273074	0.264562	0.268872
121878	0.262989	0.272156	0.270944	0.275101
122877	0.273104	0.275703	0.267189	0.269752
123876	0.275229	0.275871	0.269699	0.267171
124875	0.256536	0.270878	0.273266	0.275219
125874	0.271235	0.271028	0.260465	0.261031
126873	0.275209	0.261508	0.26297	0.275439
127872	0.276703	0.275143	0.268775	0.273212
128871	0.272356	0.27621	0.246669	0.276428
129870	0.276347	0.276322	0.265697	0.269014
130869	0.267714	0.266966	0.267287	0.27548
131868	0.27696	0.269314	0.260097	0.273131
132867	0.273455	0.271493	0.268458	0.274664
133866	0.264224	0.274599	0.262857	0.27619
134865	0.275716	0.275079	0.253224	0.271172
135864	0.26929	0.274874	0.255375	0.263663
136863	0.275849	0.267338	0.25011	0.276028
137862	0.262127	0.270982	0.262182	0.26761
138861	0.275105	0.272797	0.263573	0.276122
139860	0.269313	0.274241	0.268595	0.271036
140859	0.262044	0.268626	0.270627	0.271205
141858	0.275787	0.276154	0.248522	0.275023
142857	0.274888	0.273291	0.254396	0.269051
143856	0.267394	0.268689	0.262802	0.271781
144855	0.265832	0.267745	0.270278	0.276699
145854	0.276622	0.274429	0.263517	0.275556
146853	0.266402	0.272862	0.273543	0.27531
147852	0.275784	0.269887	0.240489	0.276288
148851	0.275739	0.259886	0.267244	0.273634
149850	0.275995	0.272804	0.267696	0.260634
150849	0.268612	0.268878	0.26459	0.274439
151848	0.273443	0.266808	0.245295	0.263552
152847	0.275009	0.276319	0.257553	0.275966
153846	0.26888	0.269413	0.255953	0.274094
154845	0.27312	0.276046	0.262323	0.271547
155844	0.265941	0.272576	0.264331	0.267086
156843	0.275389	0.276627	0.262588	0.276271
157842	0.270388	0.271434	0.26902	0.275088
158841	0.267844	0.27667	0.26168	0.231025
159840	0.277006	0.268836	0.250109	0.27663
160839	0.260877	0.273499	0.263395	0.277428
161838	0.273248	0.271024	0.269837	0.271984
162837	0.275427	0.275229	0.251533	0.270079
163836	0.273874	0.276885	0.253974	0.272197
164835	0.270532	0.274372	0.271804	0.271688
165834	0.276477	0.275619	0.272844	0.276014
166833	0.276887	0.261403	0.261887	0.275842
167832	0.267486	0.274971	0.268407	0.268723
168831	0.276092	0.276753	0.248615	0.272242
169830	0.274116	0.265319	0.25919	0.273414
170829	0.274558	0.269967	0.269388	0.275342
171828	0.273144	0.268986	0.261727	0.264472
172827	0.270589	0.273583	0.266164	0.269267
173826	0.267578	0.276852	0.272083	0.269338
174825	0.276447	0.27308	0.248337	0.2757
175824	0.27731	0.276091	0.271539	0.271855
176823	0.277929	0.276316	0.248344	0.271855
177822	0.273014	0.262599	0.253277	0.273738
178821	0.276634	0.275749	0.263858	0.272372
179820	0.267769	0.274577	0.263951	0.265266
180819	0.275929	0.277403	0.263241	0.276393
181818	0.27619	0.26842	0.262907	0.272689
182817	0.269953	0.2757	0.258621	0.269593
183816	0.273138	0.274922	0.264385	0.272427
184815	0.275694	0.276152	0.25024	0.275684
185814	0.274218	0.269316	0.257814	0.272136
186813	0.275671	0.270942	0.237536	0.270963
187812	0.269657	0.275134	0.262023	0.276043
188811	0.275384	0.273844	0.259647	0.276972
189810	0.273017	0.269703	0.269187	0.272424
190809	0.275928	0.270831	0.248806	0.276275
191808	0.276771	0.274929	0.262312	0.27525
192807	0.276257	0.271402	0.267501	0.274218
193806	0.276332	0.275071	0.260202	0.272005
194805	0.276043	0.269686	0.241031	0.270142
195804	0.277556	0.265873	0.245636	0.272557
196803	0.271132	0.254375	0.245449	0.276024
197802	0.274782	0.275427	0.249851	0.276719
198801	0.276491	0.271923	0.239053	0.265432
199800	0.27112	0.27648	0.262481	0.276916
200799	0.275952	0.27675	0.246149	0.275832
201798	0.273206	0.276114	0.251385	0.234417
202797	0.269281	0.27512	0.235123	0.276267
203796	0.27046	0.272057	0.25978	0.259202
204795	0.266486	0.275408	0.260958	0.27598
205794	0.266338	0.276158	0.25204	0.274185
206793	0.274903	0.273982	0.259818	0.262665
207792	0.273662	0.276071	0.25156	0.26552
208791	0.273688	0.275913	0.264891	0.273263
209790	0.276488	0.267879	0.259203	0.274827
210789	0.276098	0.272194	0.269025	0.273955
211788	0.269885	0.275843	0.247035	0.271138
212787	0.276615	0.274282	0.264696	0.269819
213786	0.273699	0.275992	0.256496	0.275765
214785	0.275391	0.274284	0.255443	0.269702
215784	0.2645	0.27624	0.249976	0.263893
216783	0.27203	0.273124	0.265898	0.273905
217782	0.269267	0.263555	0.263067	0.275777
218781	0.26987	0.276076	0.263409	0.273055
219780	0.275855	0.275503	0.256409	0.276305
220779	0.27263	0.275134	0.258314	0.27196
221778	0.27582	0.262205	0.263816	0.273448
222777	0.271567	0.271812	0.24853	0.266555
223776	0.272652	0.273529	0.248006	0.274637
224775	0.274088	0.268088	0.228333	0.274581
225774	0.276682	0.273506	0.257734	0.267062
226773	0.276758	0.264218	0.265288	0.274803
227772	0.27483	0.276445	0.25406	0.253612
228771	0.27651	0.27357	0.229556	0.275332
229770	0.267827	0.271261	0.273974	0.275385
230769	0.27517	0.275487	0.258189	0.27327
231768	0.267975	0.276037	0.260373	0.275897
232767	0.276006	0.259205	0.266313	0.268358
233766	0.277561	0.275134	0.259921	0.268603
234765	0.266105	0.253886	0.260117	0.271417
235764	0.275262	0.275776	0.262726	0.248187
236763	0.273826	0.275147	0.249222	0.268985
237762	0.276154	0.272918	0.270341	0.271141
238761	0.261533	0.275469	0.2592	0.274192
239760	0.275414	0.275536	0.24614	0.270762
240759	0.268505	0.269497	0.249304	0.268428
241758	0.27445	0.261477	0.260641	0.274755
242757	0.27046	0.271769	0.259525	0.263338
243756	0.265807	0.259075	0.261973	0.276166
244755	0.274361	0.276321	0.270685	0.274814
245754	0.277017	0.276403	0.26891	0.27311
246753	0.265091	0.27064	0.255026	0.273871
247752	0.271191	0.258898	0.269265	0.265734
248751	0.276439	0.275112	0.269999	0.275674
249750	0.276781	0.276485	0.26999	0.275467
250749	0.274751	0.273761	0.257797	0.276449
251748	0.269535	0.274942	0.27183	0.271928
252747	0.276732	0.275204	0.263139	0.272576
253746	0.272882	0.273924	0.251881	0.260663
254745	0.267139	0.273343	0.257089	0.264298
255744	0.269822	0.27395	0.266651	0.276466
256743	0.268277	0.272791	0.266901	0.262156
257742	0.271802	0.274164	0.26964	0.272782
258741	0.267985	0.275953	0.266534	0.271965
259740	0.270413	0.268494	0.273742	0.275762

## Sheet: RewardGraphs9agents
Step	Strats	Peak	Central	AllShared	LSD Mean	i-MADDPG Mean	DDPG Mean	CTDE Mean	LSDSTDV	i-MADDPGSTDV	DDPGSTDV	CTDESTDV	StratsAUC	PeakAUC	CentralAUC	AllSharedAUC
999	-0.0346744	0.138052	-2.72406	-0.338886	0.203023	0.188443	0.0291319	0.186631	0.0183583	0.0101956	0.307759	0.0341065	60.9068	56.5328	8.73958	55.9894
1998	0.176515	0.16062	-2.05874	0.0782315
2997	0.170507	0.164027	-1.82387	0.086065
3996	0.180631	0.169363	-2.12832	0.191732
4995	0.186336	0.16729	-0.643443	0.203202
5994	0.181065	0.168972	-0.602408	0.202202
6993	0.165078	0.168964	-0.758072	0.202581
7992	0.185249	0.16577	-0.861132	0.186982
8991	0.188172	0.174876	-1.11139	0.185165
9990	0.185204	0.174219	-0.324792	0.199372
10989	0.191033	0.16959	-0.549523	0.201753
11988	0.19799	0.173572	-0.508722	0.201199
12987	0.190303	0.173926	-0.889118	0.196547
13986	0.191596	0.172235	-0.552371	0.186998
14985	0.179517	0.142656	-0.189657	0.201243
15984	0.186934	0.190238	-0.132163	0.198506
16983	0.113534	0.186482	-0.142775	0.189911
17982	0.193374	0.193904	-0.173533	0.202802
18981	0.187144	0.178474	-0.164491	0.205034
19980	0.199004	0.196573	-0.237603	0.195902
20979	0.187014	0.191627	-0.0496777	0.194287
21978	0.197382	0.172353	-0.109981	0.208273
22977	0.196596	0.20056	0.0975536	0.175611
23976	0.190016	0.198771	0.0246429	0.192775
24975	0.198947	0.197374	0.0821387	0.18476
25974	0.193065	0.196771	0.0375497	0.20228
26973	0.19123	0.197593	-0.0773138	0.16524
27972	0.193936	0.178526	0.0411534	0.173445
28971	0.202294	0.193209	-0.0221434	0.205568
29970	0.199497	0.184745	0.140861	0.152106
30969	0.193844	0.176527	0.108232	0.191393
31968	0.192386	0.195063	0.0753543	0.178417
32967	0.19213	0.199881	0.100807	0.193372
33966	0.196124	0.16764	0.0792909	0.203899
34965	0.198304	0.197614	0.074499	0.194591
35964	0.200819	0.202315	0.0103156	0.206527
36963	0.197248	0.194686	0.132019	0.201645
37962	0.194993	0.1843	0.0937568	0.199741
38961	0.199018	0.201501	0.0950188	0.199086
39960	0.197851	0.188379	0.144379	0.199905
40959	0.194923	0.192742	0.128074	0.182934
41958	0.18867	0.189658	0.103742	0.201698
42957	0.188748	0.199522	0.107077	0.197228
43956	0.200825	0.20197	0.0835041	0.182424
44955	0.19145	0.189515	0.124765	0.181975
45954	0.195449	0.20107	0.0741271	0.203748
46953	0.197596	0.188798	0.119613	0.196098
47952	0.197536	0.202877	0.111577	0.199088
48951	0.188363	0.198931	0.0610047	0.177781
49950	0.201485	0.183669	0.105604	0.188753
50949	0.20037	0.193535	0.142564	0.19438
51948	0.194513	0.192132	0.134499	0.196926
52947	0.198682	0.200464	0.129104	0.195104
53946	0.181461	0.194802	0.106124	0.189914
54945	0.195236	0.197906	0.100124	0.207432
55944	0.194681	0.201885	0.149179	0.195223
56943	0.18955	0.191368	0.143622	0.196166
57942	0.192128	0.197689	0.12791	0.15654
58941	0.193713	0.193998	0.134281	0.179121
59940	0.192622	0.197535	0.0252619	0.190167
60939	0.194045	0.195613	0.100952	0.189788
61938	0.195457	0.197394	0.0701031	0.196385
62937	0.19752	0.191614	0.0958072	0.171854
63936	0.19269	0.195799	0.161137	0.179733
64935	0.194914	0.190868	0.0474278	0.192574
65934	0.191176	0.196179	0.0433116	0.184555
66933	0.197606	0.199459	0.133611	0.20008
67932	0.192196	0.197599	0.102759	0.197002
68931	0.190231	0.188373	0.111624	0.187489
69930	0.178273	0.189161	0.135386	0.203692
70929	0.196091	0.197464	0.116647	0.197081
71928	0.188177	0.191422	0.0426695	0.166874
72927	0.197767	0.192729	0.142195	0.204048
73926	0.189363	0.194566	0.104634	0.180804
74925	0.17855	0.194283	0.0860834	0.193414
75924	0.18498	0.194131	0.0569163	0.17619
76923	0.197835	0.194534	0.149741	0.207586
77922	0.199187	0.188213	-0.0228972	0.191926
78921	0.199643	0.198241	0.165054	0.179379
79920	0.197107	0.191444	0.0361137	0.179978
80919	0.194895	0.195154	0.114185	0.201517
81918	0.193432	0.171327	0.0905292	0.188573
82917	0.189133	0.154087	0.140743	0.203862
83916	0.185928	0.168976	0.105771	0.209518
84915	0.195003	0.192577	0.0525737	0.198219
85914	0.193819	0.193222	0.147192	0.200603
86913	0.195878	0.199121	0.155497	0.179966
87912	0.201514	0.193819	0.00276431	0.179881
88911	0.203812	0.200615	0.131584	0.147426
89910	0.201659	0.184858	0.0847614	0.179344
90909	0.199403	0.19252	0.11803	0.195793
91908	0.201113	0.192967	0.125701	0.197603
92907	0.201076	0.191493	0.152708	0.187388
93906	0.194296	0.185474	0.117372	0.191612
94905	0.19374	0.179592	0.0312757	0.187319
95904	0.198639	0.197138	0.0989767	0.197121
96903	0.215567	0.197139	0.156087	0.192059
97902	0.215431	0.194705	0.111822	0.181234
98901	0.195762	0.195242	0.0985009	0.175127
99900	0.208892	0.191763	-0.0398135	0.19675
100899	0.213192	0.194871	0.130069	0.179004
101898	0.214016	0.151453	0.151731	0.177083
102897	0.208009	0.186878	0.112929	0.192602
103896	0.210337	0.200068	0.0632187	0.189372
104895	0.212285	0.190843	0.0982594	0.195571
105894	0.220599	0.194106	0.0993981	0.18384
106893	0.215331	0.189146	0.162931	0.19186
107892	0.208708	0.193059	0.076762	0.186504
108891	0.215089	0.194229	0.14767	0.199104
109890	0.21147	0.189735	0.0748758	0.201691
110889	0.204903	0.177934	0.0547532	0.199489
111888	0.21212	0.198835	0.0873081	0.142549
112887	0.214099	0.182347	0.011191	0.195183
113886	0.206639	0.184464	0.137452	0.195144
114885	0.213461	0.188992	-0.019275	0.206483
115884	0.209389	0.189133	0.0261743	0.190784
116883	0.203328	0.175876	0.148863	0.200174
117882	0.20772	0.198222	0.156595	0.170799
118881	0.204869	0.195896	0.150841	0.191936
119880	0.209033	0.177531	-0.0927398	0.198742
120879	0.214515	0.175385	0.0314917	0.163723
121878	0.21295	0.180366	0.141448	0.175345
122877	0.199713	0.194283	-0.145068	0.180553
123876	0.208194	0.190431	0.150144	0.192326
124875	0.204933	0.189916	0.12183	0.19584
125874	0.20966	0.189086	-5.93029e-05	0.195037
126873	0.201151	0.194847	0.156928	0.196456
127872	0.207853	0.182917	0.12592	0.200768
128871	0.206548	0.187539	0.0592771	0.17983
129870	0.220019	0.193822	0.0295625	0.194985
130869	0.21005	0.184397	0.0626697	0.187779
131868	0.209943	0.197011	0.158091	0.210721
132867	0.215605	0.201736	-0.223281	0.202333
133866	0.196031	0.198694	0.15462	0.200808
134865	0.210359	0.200298	0.147446	0.186492
135864	0.210556	0.194632	-0.0464926	0.210106
136863	0.212567	0.19042	0.115427	0.201314
137862	0.207802	0.199101	0.0429324	0.203567
138861	0.217437	0.191579	0.148155	0.194563
139860	0.212014	0.18882	0.119614	0.203796
140859	0.218843	0.187321	0.0799147	0.175363
141858	0.216465	0.176925	0.141416	0.148649
142857	0.209785	0.191694	0.0271502	0.200102
143856	0.21414	0.184687	0.158301	0.197018
144855	0.200157	0.190898	0.151344	0.189754
145854	0.221432	0.189349	0.158111	0.189468
146853	0.212349	0.194239	0.0355912	0.199934
147852	0.211229	0.189082	0.0985161	0.200817
148851	0.211113	0.180876	0.0991214	0.200217
149850	0.216528	0.18892	0.111327	0.201282
150849	0.204905	0.192621	-0.0217821	0.190998
151848	0.217705	0.188604	0.0964075	0.177998
152847	0.216723	0.197375	0.156755	0.171225
153846	0.215415	0.176207	0.120421	0.188389
154845	0.219362	0.190724	0.0573502	0.190298
155844	0.212742	0.176333	0.151171	0.200592
156843	0.192036	0.193294	0.121113	0.173457
157842	0.203836	0.193594	0.133477	0.193647
158841	0.209278	0.199005	0.0986398	0.188449
159840	0.214625	0.187903	0.130958	0.203468
160839	0.213772	0.187348	0.157374	0.199587
161838	0.207019	0.189924	0.120479	0.194494
162837	0.205135	0.185448	-0.0369913	0.208619
163836	0.216029	0.196956	0.14835	0.19683
164835	0.217502	0.191761	0.137361	0.1906
165834	0.208653	0.182266	-0.354916	0.191482
166833	0.207263	0.19735	0.0328033	0.18529
167832	0.21984	0.185308	0.0949368	0.198269
168831	0.200028	0.196779	0.0764593	0.193561
169830	0.195096	0.194141	0.0765899	0.177032
170829	0.209576	0.189135	0.000248571	0.183011
171828	0.211255	0.187755	0.0194551	0.187793
172827	0.213188	0.191672	0.0423678	0.183913
173826	0.204873	0.196222	0.00618403	0.182182
174825	0.218843	0.198934	0.00247627	0.174503
175824	0.203042	0.195531	0.136838	0.193906
176823	0.215074	0.201814	0.155049	0.155901
177822	0.217348	0.186953	-0.0054936	0.169401
178821	0.214911	0.188499	0.0473125	0.165568
179820	0.210217	0.180668	0.0773937	0.190636
180819	0.210866	0.187456	0.112966	0.180421
181818	0.191984	0.196104	0.104329	0.195255
182817	0.208473	0.187791	0.151004	0.19953
183816	0.209715	0.17846	0.124053	0.194778
184815	0.219426	0.180066	0.0841408	0.198203
185814	0.220314	0.193869	0.136471	0.177095
186813	0.2044	0.201299	0.135153	0.160137
187812	0.218293	0.193118	0.142054	0.183931
188811	0.220316	0.197907	0.094028	0.189116
189810	0.216173	0.19411	0.127118	0.202841
190809	0.214837	0.191817	0.12241	0.188915
191808	0.201079	0.197784	0.0498566	0.193423
192807	0.211462	0.200833	0.147531	0.195926
193806	0.192016	0.196797	0.147494	0.179003
194805	0.205746	0.174439	0.112388	0.197531
195804	0.186479	0.192384	0.155455	0.181954
196803	0.208577	0.187822	0.104322	0.167105
197802	0.199264	0.188591	0.0756057	0.192789
198801	0.203367	0.196073	-0.199022	0.200696
199800	0.197633	0.20138	0.003534	0.201359
200799	0.21377	0.191165	0.0547317	0.204182
201798	0.221598	0.176123	0.135599	0.192642
202797	0.214647	0.197219	-0.142797	0.206848
203796	0.218364	0.190343	0.14779	0.195037
204795	0.215667	0.185026	0.148276	0.184888
205794	0.21915	0.163455	0.0909286	0.192375
206793	0.204197	0.19174	-0.0568051	0.172034
207792	0.205703	0.19468	0.0978627	0.192259
208791	0.199799	0.187378	0.154129	0.193381
209790	0.20669	0.177306	0.110048	0.203047
210789	0.213025	0.17751	0.148121	0.199027
211788	0.210616	0.191464	0.112706	0.194795
212787	0.200259	0.176616	0.0557623	0.187239
213786	0.202999	0.184246	0.131283	0.161801
214785	0.210894	0.177039	0.15544	0.17842
215784	0.213289	0.190691	0.121126	0.208825
216783	0.217589	0.180315	0.14901	0.195339
217782	0.212142	0.188948	0.106187	0.207927
218781	0.216623	0.197799	0.0136763	0.187001
219780	0.198085	0.184131	0.13987	0.199401
220779	0.207393	0.191899	0.156289	0.197481
221778	0.215991	0.195983	0.137816	0.185336
222777	0.205023	0.185613	0.0866748	0.174264
223776	0.165764	0.193013	0.153704	0.183605
224775	0.188489	0.187287	0.149509	0.199299
225774	0.208811	0.192971	0.147932	0.188976
226773	0.208334	0.193165	0.154307	0.173745
227772	0.201374	0.198466	0.0847791	0.158287
228771	0.182316	0.192825	0.0139751	0.190884
229770	0.207142	0.174566	0.0939231	0.205587
230769	0.219234	0.190222	-0.091902	0.205974
231768	0.208563	0.183677	0.154263	0.192675
232767	0.213655	0.19289	0.14903	0.19762
233766	0.220479	0.18694	0.148702	0.167903
234765	0.213006	0.171297	0.126152	0.198103
235764	0.212513	0.176318	0.0395945	0.196289
236763	0.209601	0.180655	0.155027	0.194642
237762	0.206494	0.176843	0.146229	0.194579
238761	0.189121	0.189468	-0.121651	0.187524
239760	0.213436	0.184955	0.0774672	0.18632
240759	0.211705	0.201708	0.141407	0.15437
241758	0.206722	0.199954	0.155862	0.197473
242757	0.215027	0.195387	0.163568	0.196317
243756	0.210568	0.189982	0.111978	0.162939
244755	0.213818	0.200313	0.155601	0.195676
245754	0.201587	0.198204	0.148894	0.177133
246753	0.217451	0.188678	0.112136	0.191397
247752	0.206627	0.174355	0.155243	0.175851
248751	0.209767	0.180575	0.148322	0.157493
249750	0.208023	0.160503	0.0985183	0.182504
250749	0.217176	0.184457	0.156198	0.180848
251748	0.21821	0.190377	0.0216347	0.17983
252747	0.22153	0.182414	0.156322	0.158049
253746	0.207178	0.189961	0.0428297	0.169281
254745	0.195519	0.178938	0.143054	0.189243
255744	0.215944	0.158428	0.155909	0.190527
256743	0.217435	0.195191	0.149141	0.18781
257742	0.218357	0.189856	-0.0444407	0.190422
258741	0.215457	0.192909	0.0626654	0.191817
259740	0.217415	0.185556	0.058861	0.192134
260739	0.206217	0.199998	0.133405	0.198157
261738	0.192434	0.186788	0.137839	0.178145
262737	0.209097	0.18597	0.0508805	0.161448
263736	0.210055	0.187741	0.135198	0.178788
264735	0.209255	0.192449	0.137697	0.172452
265734	0.20265	0.179537	0.101741	0.180722
266733	0.209097	0.185884	0.137562	0.177283
267732	0.208889	0.18993	0.137434	0.173135
268731	0.216551	0.192259	0.0199097	0.17158
269730	0.211609	0.186194	0.138766	0.175129
270729	0.215271	0.180867	0.0371762	0.182054
271728	0.220337	0.200403	0.124997	0.208259
272727	0.215371	0.19226	0.139386	0.182554
273726	0.196156	0.187679	-0.00302819	0.194787
274725	0.209452	0.188107	0.116936	0.193447
275724	0.195594	0.186361	0.12981	0.194893
276723	0.20148	0.191745	0.124364	0.189733
277722	0.199312	0.194517	0.11528	0.194803
278721	0.211004	0.193212	0.102574	0.196026
279720	0.209408	0.190438	0.124447	0.164511
280719	0.209584	0.189864	0.0803107	0.185598
281718	0.213965	0.194191	0.00627525	0.177853
282717	0.207316	0.190761	0.0248511	0.201111
283716	0.220777	0.1876	0.155538	0.189574
284715	0.215879	0.198208	0.140371	0.173183
285714	0.21516	0.186687	0.155833	0.19218
286713	0.213612	0.19274	0.134475	0.183446
287712	0.220242	0.161149	0.0690075	0.202717
288711	0.216897	0.178282	0.111502	0.201244
289710	0.208448	0.181755	0.0775055	0.190982
290709	0.20577	0.197841	0.0924053	0.181221
291708	0.197244	0.195695	0.144259	0.180082
292707	0.199703	0.195351	0.0999708	0.175116
293706	0.196185	0.190911	0.0345258	0.180424
294705	0.197268	0.186716	0.155605	0.160232
295704	0.192082	0.196251	0.0845134	0.191316
296703	0.20467	0.185388	0.156124	0.183305
297702	0.215592	0.172485	0.156012	0.191533
298701	0.204004	0.180893	0.0984288	0.188738
299700	0.218545	0.176449	-0.198471	0.203496

## Sheet: ComparingLSDandMADDPG
CTDE-MADDPG		Building 1	Building 2	Building 3	peak	LSD-MADDPG		Building 1	Building 2	Building 3	peak		CTDE	LSD
Price	Hour	Total_Energy	Total_Energy	Total_Energy		Price	Hour	Total_Energy	Total_Energy	Total_Energy			27.3072	27.6768
0.54	12	0.363832	0	0	0.363832	0.54	12	0.362569	0.36346	0.174721	0.900751		24.676	31.0355
0.54	13	0.107107	0	0	0.107107	0.54	13	0.1394	0.0725068	0.0797202	0.291627		0.106819	0.295788
0.54	14	0.071406	0	0	0.071406	0.54	14	0.068847	0.0721936	0.114176	0.255217
0.54	15	0.0356828	0	0	0.0356828	0.54	15	0.0696713	0.0362669	0.108856	0.214794		25.9916	29.3562
0.54	16	0.106915	0	0.125063	0.231978	0.54	16	0.0710015	0.0721916	0.0713183	0.214511
0.54	17	0.0355839	0	0.0781109	0.113695	0.54	17	0.0356972	0.071615	0.0711559	0.178468
0.54	18	0.0356584	0.0929585	0.278869	0.407486	0.54	18	0.0352921	0.0354619	0	0.070754
0.54	19	0	0.0914807	0.170276	0.261757	0.54	19	0	0	0	0
0.54	20	0	0.0916734	0	0.0916734	0.54	20	0	0	0	0
0.36	21	4.92213	3.93659	0.0967397	8.95546	0.36	21	5.53166	9.82908	6.24317	21.6039
0.22	22	14.5161	10.0998	2.69139	27.3072	0.22	22	8.48668	12.9908	6.19937	27.6768
0.22	23	9.70661	7.78	6.32301	23.8096	0.22	23	7.08106	8.08989	5.84691	21.0179
0.22	24	10.3692	8.34427	6.96609	25.6795	0.22	24	6.17085	6.83561	5.712	18.7185
0.22	1	4.09994	8.80946	9.9507	22.8601	0.22	1	5.8537	4.92731	6.17954	16.9605
0.22	2	3.33794	0.0944862	7.77006	11.2025	0.22	2	5.10409	2.93066	6.80745	14.8422
0.22	3	2.31655	4.52532	6.24794	13.0898	0.22	3	4.45597	2.57495	6.70196	13.7329
0.22	4	1.82658	4.4843	5.59373	11.9046	0.22	4	3.9995	2.50376	5.6982	12.2015
0.22	5	1.77101	3.82546	5.0929	10.6894	0.22	5	4.60041	2.81435	3.80217	11.2169
0.22	6	1.70743	5.44464	4.99971	12.1518	0.22	6	4.72903	3.10385	2.96188	10.7947
0.22	7	3.30373	2.17087	4.80559	10.2802	0.22	7	3.52098	3.36709	2.45605	9.34413
0.54	8	0.114392	0.0425584	0.0903662	0.247316	0.54	8	0.244014	0.170825	0	0.414839
0.54	9	0	0.0765408	0.0904816	0.167022	0.54	9	0	0.0971218	0.0739861	0.171108
0.54	10	0	0.286313	0.180731	0.467044	0.54	10	0	0.0391871	0	0.0391871
0.54	11	0.0356581	0.0920438	0	0.127702	0.54	11	0	0	0.0997191	0.0997191
0.54	12	0.0357319	0.0913864	0.0904051	0.217523	0.54	12	0.0714647	0.0737787	0	0.145243
0.54	13	0.0357322	0	0	0.0357322	0.54	13	0.0696232	0.072657	0	0.14228
0.54	14	0.0357332	0	0.0903528	0.126086	0.54	14	0.0349088	0	0.0769572	0.111866
0.54	15	0	0.0924647	0.0909375	0.183402	0.54	15	0	0	0.0366236	0.0366236
0.54	16	0.0712882	0	0.169602	0.24089	0.54	16	0.0709502	0.0722081	0.107099	0.250258
0.54	17	0.106786	0	0.116086	0.222872	0.54	17	0.0712821	0.107636	0.0711777	0.250096
0.54	18	0.0356467	0	0.280148	0.315795	0.54	18	0.105242	0.0704828	0.0359373	0.211662
0.54	19	0.106737	0.0917528	0.250769	0.449259	0.54	19	0.0365444	0.0716431	0.107562	0.215749
0.54	20	0.0712731	0	0.0774737	0.148747	0.54	20	0.0734144	0.071417	0.0714826	0.216314
0.22	21	14.5259	8.66569	0.279245	23.4708	0.22	21	9.20722	15.2178	6.61052	31.0355
0.22	22	8.0015	6.8196	5.53948	20.3606	0.22	22	7.74479	10.5338	6.37557	24.6542
0.22	23	8.97209	7.63031	4.90302	21.5054	0.22	23	6.6073	6.78216	5.70546	19.0949
0.22	24	9.63421	8.06729	6.97448	24.676	0.22	24	5.40871	5.9341	5.67627	17.0191
0.22	1	3.03061	8.2505	9.51473	20.7958	0.22	1	5.70433	4.38197	6.22471	16.311
0.54	2	0	0.0928667	0.37076	0.463627	0.54	2	0	0.196328	0	0.196328
0.22	3	4.70873	0.0930102	6.98523	11.787	0.22	3	4.97354	6.09851	6.85849	17.9305
0.22	4	1.9899	7.24119	6.09301	15.3241	0.22	4	4.84753	2.09101	8.54331	15.4819
0.22	5	1.79588	4.90682	5.35347	12.0562	0.22	5	7.63714	2.18606	5.83615	15.6594
0.22	6	1.86643	5.16341	6.34559	13.3754	0.22	6	4.40054	3.32281	3.57972	11.3031
0.22	7	3.25848	2.05652	7.52348	12.8385	0.22	7	3.15769	3.2989	2.76775	9.22435
0.54	8	0.111449	0.0421211	0.0903503	0.24392	0.54	8	0.279129	0.168365	0	0.447494
0.54	9	0.0714801	0.15242	0	0.2239	0.54	9	0.0718218	0	0.144098	0.21592
0.54	10	0.142535	0.191429	0	0.333964	0.54	10	0.108492	0.155319	0.038504	0.302315
0.54	11	0.106819	0	0	0.106819	0.54	11	0.143203	0.112657	0.0399275	0.295788

## Sheet: comparing3MARLcapablitlies
LSD	Rewards	Costs	Charge	Peak Contribbution			CTDE	Rewards	Costs	Charge	Peak Contribbution			Ind	Rewards	Costs	Charge	Peak Contribbution		DDPG	Rewards	Costs	Charge	Peak Contribbution		Naïve	Rewards	Costs	Charge	Peak Contribbution
B1	13.1482	28.1712	116.73	14.1703			B1	12.1622	27.1267	114.894	16.296			B1	12.4823	27.2457	118.949	12.2533		B1	10.2006	25.6977	110.692	11.4723		B1	2.21165	63.9745	128	11.4723
B2	12.4225	28.925	117.838	15.045			B2	12.698	27.4263	116.022	10.8932			B2	13.548	27.9411	116.485	18.1537		B2	12.0397	26.4205	116.069	11.4082		B2	2.21165	63.9745	128	11.4082
B3	13.1204	27.3895	116.018	14.2541			B3	13.8667	27.8505	116.818	15.9838			B3	12.0394	28.0488	119.713	11.2815		B3	12.1223	27.4806	118.261	13.7904		B3	2.21165	63.9745	128	13.7904
sum	38.6911	84.4858	350.586	43.4694			sum	38.7269	82.4035	347.734	43.173			sum	38.0696	83.2356	355.147	41.6884		sum	34.3626	79.5988	345.021	36.6709		sum	6.63496	191.923	384	36.6709
			91.2985							90.5557							92.4861						89.8493						100
